# Supplementary material
Source: PubMed Central journal article supplement (PMC6067013)

**Supplemental Table 1: The *flh::EGFP* transgene is expressed in the pineal anlage of Nodal signaling mutants with an open anterior neural tube.**

| Pineal phenotype<br><i>flh::EGFP</i> transgene |       |           |         |
|------------------------------------------------|-------|-----------|---------|
|                                                | Round | Elongated | Divided |
| WT siblings                                    | 53    | 0         | 0       |
| <i>cyc<sup>m294</sup></i>                      | 10    | 0         | 0       |
| <i>sqt<sup>cz35</sup></i>                      | 9     | 1         | 1       |
| <i>cyc<sup>m294</sup>; sqt<sup>cz35</sup></i>  | 0     | 2         | 2       |

**Supplemental Table 2: Endogenous *flh* mRNA is expressed in the pineal anlage of Nodal signaling mutants with an open anterior neural tube.**

| Pineal phenotype<br><i>flh</i> mRNA           |       |           |         |
|-----------------------------------------------|-------|-----------|---------|
|                                               | Round | Elongated | Divided |
| WT siblings                                   | 67    | 0         | 0       |
| <i>cyc<sup>m294</sup></i>                     | 46    | 0         | 0       |
| <i>sqt<sup>cz35</sup></i>                     | 34    | 3         | 2       |
| <i>cyc<sup>m294</sup>; sqt<sup>cz35</sup></i> | 0     | 0         | 3       |

Supplemental Figure 1

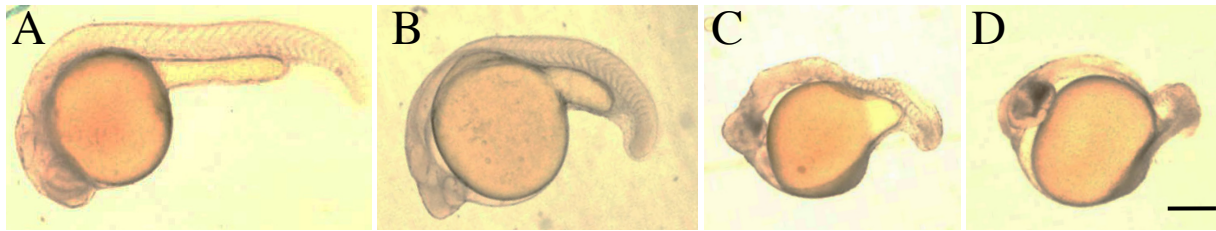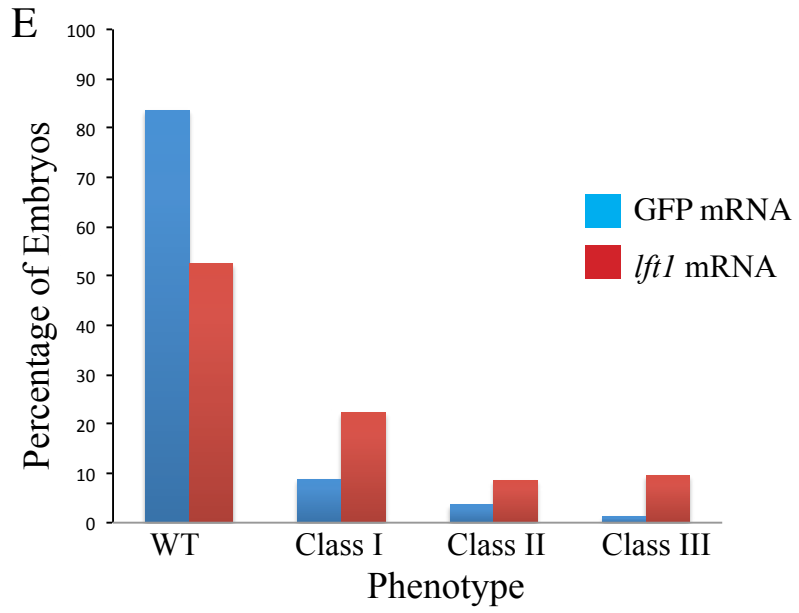

Supplemental Figure 2

*ctn/flh* expression

A

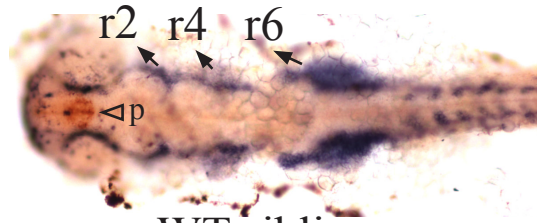

WT siblings  
oval pineal

B

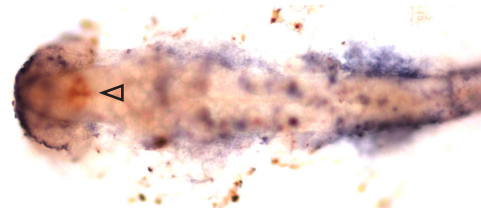

*sqt*  
oval pineal

C

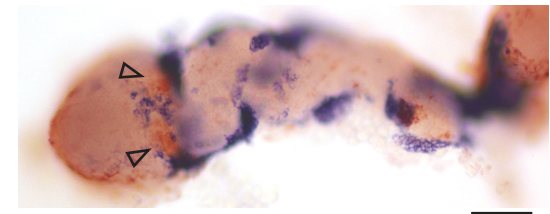

*sqt*  
divided pineal

*otx5* expression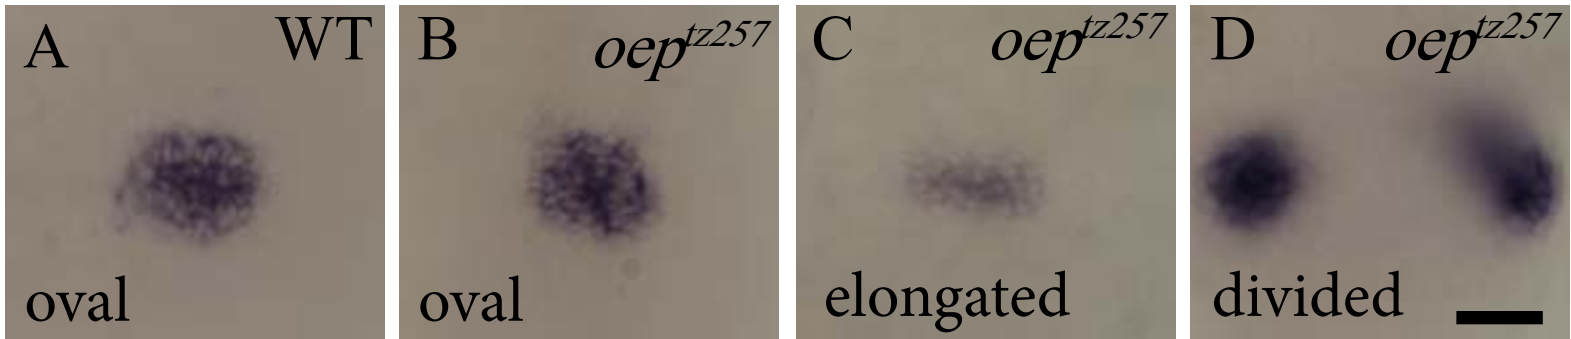

E

|                             | Pineal Phenotype |           |          |
|-----------------------------|------------------|-----------|----------|
|                             | oval             | elongated | divided  |
| WT sibs                     | 37 (100%)        | 0 (0%)    | 0 (0%)   |
| <i>oep</i> <sup>m134</sup>  | 22 (84%)         | 2 (7%)    | 2 (7%)   |
| WT sibs                     | 54 (100%)        | 0 (0%)    | 0 (0%)   |
| <i>oep</i> <sup>tz257</sup> | 33 (41%)         | 7 (8%)    | 39 (49%) |

# Supplemental Figure 4

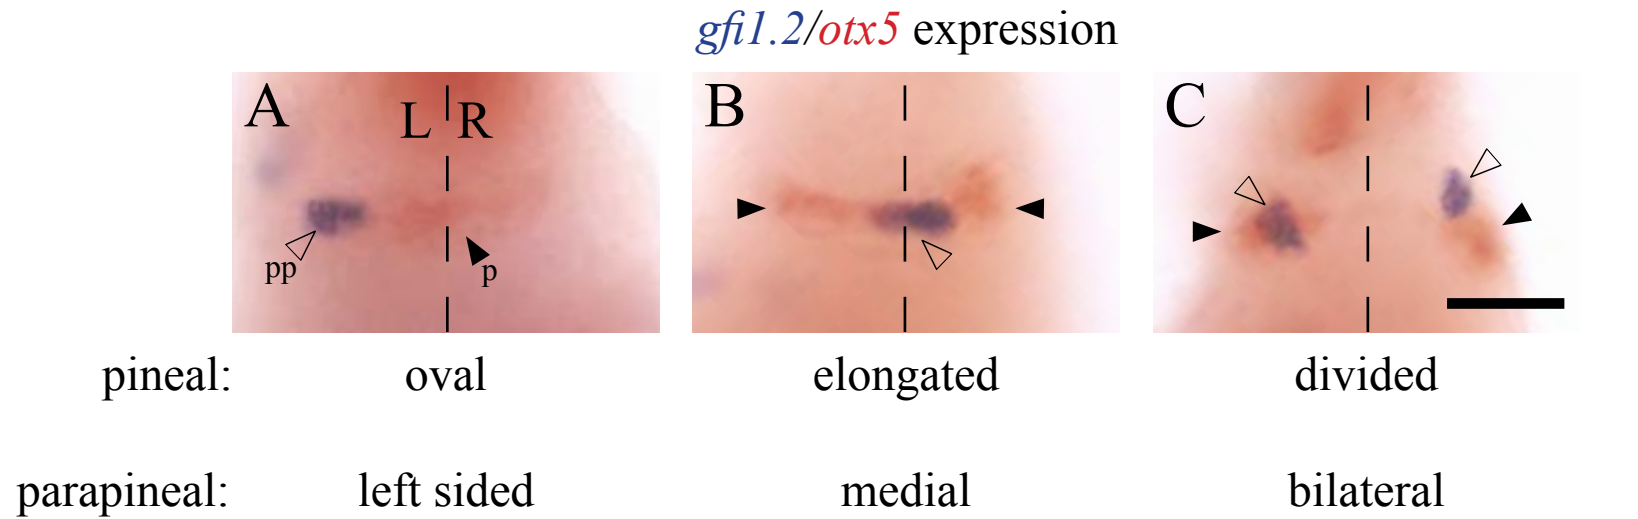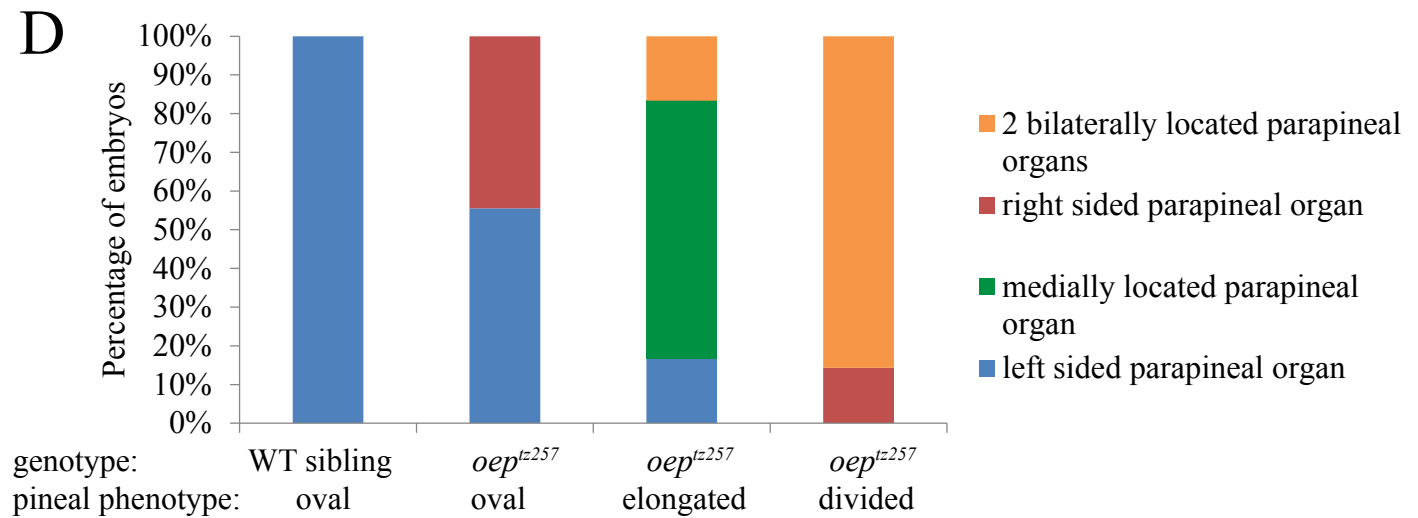

# Supplemental Figure 5

*kctd12.1* expression

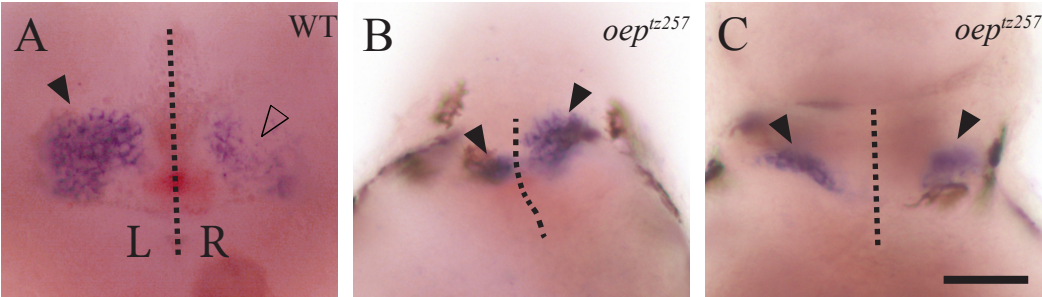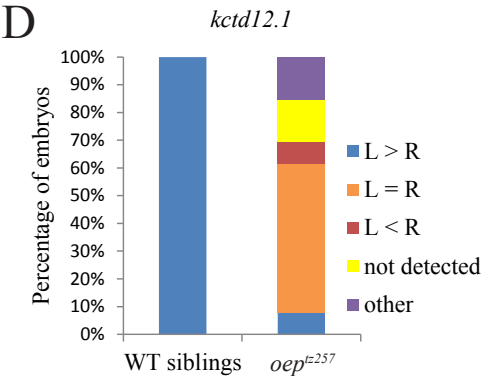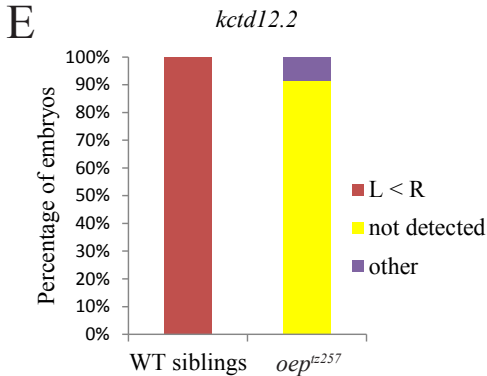

Supplement: NIHMS425584-supplement-01.pdf [file NIHMS425584-supplement-01.pdf]
